# Supplementary material for: Cross-Phosphorylation between AgrC Histidine Kinase and the Noncognate Response Regulator Lmo1172 in Listeria monocytogenes under Benzalkonium Chloride Stress
Source: MDPI journal article supplement (doi:10.3390/microorganisms12020392), 2024-02-16
Supplement: s1 [file s1]

**Table S1.** Bacterial strains and plasmids used in this study.

| Strain or Plasmid                                                  | Genotype <sup>a</sup>                                                         | Reference or Source |
|--------------------------------------------------------------------|-------------------------------------------------------------------------------|---------------------|
| Strain                                                             |                                                                               |                     |
| <i>L. monocytogenes</i>                                            |                                                                               |                     |
| EGD-e                                                              | Wild-type strain; deposition number ATCC® BAA-679™                            | A gift from Qin Luo |
| EGD-epPTPL-P <sub>2</sub>                                          | EGD-e containing pPTPL-P <sub>2</sub>                                         | 49                  |
| $\Delta$ <i>agrBDCA</i>                                            | In-frame deletion of <i>agrBDCA</i>                                           | 21                  |
| $\Delta$ <i>agrBD</i>                                              | In-frame deletion of <i>agrBD</i>                                             | This study          |
| $\Delta$ <i>agrC</i>                                               | In-frame deletion of <i>agrC</i>                                              | This study          |
| $\Delta$ <i>agrA</i>                                               | In-frame deletion of <i>agrA</i>                                              | 49                  |
| C $\Delta$ <i>agrBDCA</i>                                          | Complemented strain of $\Delta$ <i>agrBDCA</i>                                | This study          |
| C $\Delta$ <i>agrBD</i>                                            | Complemented strain of $\Delta$ <i>agrBD</i>                                  | This study          |
| C $\Delta$ <i>agrC</i>                                             | Complemented strain of $\Delta$ <i>agrC</i>                                   | This study          |
| C $\Delta$ <i>agrA</i>                                             | Complemented strain of $\Delta$ <i>agrA</i>                                   | 49                  |
| $\Delta$ <i>agrBDCA</i> pERL3                                      | $\Delta$ <i>agrBDCA</i> containing pERL3                                      | This study          |
| $\Delta$ <i>agrBD</i> pERL3                                        | $\Delta$ <i>agrBD</i> containing pERL3                                        | This study          |
| $\Delta$ <i>agrC</i> pERL3                                         | $\Delta$ <i>agrC</i> containing pERL3                                         | This study          |
| $\Delta$ <i>agrA</i> pERL3                                         | $\Delta$ <i>agrA</i> containing pERL3                                         | 49                  |
| $\Delta$ <i>agrBD</i> pERL3- <i>agrC</i>                           | $\Delta$ <i>agrBD</i> containing pERL3- <i>agrC</i>                           | This study          |
| $\Delta$ <i>agrC</i> pERL3- <i>agrBD</i>                           | $\Delta$ <i>agrC</i> containing pERL3- <i>agrBD</i>                           | This study          |
| $\Delta$ <i>lmo1172</i>                                            | In-frame deletion of <i>lmo1172</i>                                           | This study          |
| $\Delta$ <i>agrA</i> $\Delta$ <i>lmo1172</i>                       | In-frame deletion of <i>agrA</i> and <i>lmo1172</i>                           | This study          |
| $\Delta$ <i>agrA</i> $\Delta$ <i>lmo1172</i> pERL3- <i>agrA</i>    | $\Delta$ <i>agrA</i> $\Delta$ <i>lmo1172</i> containing pERL3- <i>agrA</i>    | This study          |
| $\Delta$ <i>agrA</i> $\Delta$ <i>lmo1172</i> pERL3- <i>lmo1172</i> | $\Delta$ <i>agrA</i> $\Delta$ <i>lmo1172</i> containing pERL3- <i>lmo1172</i> | This study          |
| $\Delta$ <i>lmo1173</i>                                            | In-frame deletion of <i>lmo1173</i>                                           | This study          |
| $\Delta$ <i>lmo1172</i> $\Delta$ <i>lmo1173</i>                    | In-frame deletion of <i>lmo1172</i> and <i>lmo1173</i>                        | This study          |

|                                      |                                                                                   |                        |
|--------------------------------------|-----------------------------------------------------------------------------------|------------------------|
| <i>ΔagrAΔlmo1173</i>                 | In-frame deletion of <i>agrA</i> and <i>lmo1173</i>                               | This study             |
| <i>Δlmo1172</i> pPTPL-P <sub>2</sub> | <i>Δlmo1172</i> containing pPTPL-P <sub>2</sub>                                   | This study             |
| <i>E. coli</i>                       |                                                                                   |                        |
| DH5α                                 | Chemical competent strain                                                         | Biomed, Beijing, China |
| BL21(DE3)                            | Expression host                                                                   | Biomed, Beijing, China |
| C43(DE3)                             | Expression host                                                                   | Biomed, Beijing, China |
| Plasmid                              |                                                                                   |                        |
| pPTPL-P <sub>2</sub>                 | pPTPL containing the putative promoter region of the <i>agr</i> operon            | 49                     |
| pMAD                                 | Cloning shuttle integration vector plasmid, Amp <sup>R</sup> and Ery <sup>R</sup> | 27                     |
| pMAD- <i>ΔagrBD</i>                  | pMAD containing homologous arms up- and downstream of EGD-e <i>agrBD</i>          | This study             |
| pMAD- <i>ΔagrC</i>                   | pMAD containing homologous arms up- and downstream of EGD-e <i>agrC</i>           | This study             |
| pERL3                                | Plasmid capable of replication in <i>L. monocytogenes</i> , Ery <sup>R</sup>      | 28                     |
| pERL3- <i>agrBDCA</i>                | pERL3 containing the upstream region and coding sequence of <i>agrBDCA</i>        | This study             |
| pERL3- <i>agrBD</i>                  | pERL3 containing the promoter region and coding sequence of <i>agrBD</i>          | This study             |
| pERL3- <i>agrC</i>                   | pERL3 containing the promoter region and coding sequence of <i>agrC</i>           | This study             |
| pERL3- <i>agrA</i>                   | pERL3 containing the promoter region and coding sequence of <i>agrA</i>           | 49                     |
| pERL3- <i>lmo1172</i>                | pERL3 containing the upstream region and coding sequence of <i>lmo1172</i>        | This study             |
| pET28a                               | Expression vector, Amp <sup>R</sup>                                               | Biomed, Beijing, China |
| pET32a- <i>lmo1172</i>               | pET28a containing the full length of <i>lmo1172</i>                               | This study             |
| pET28a- <i>lmo1173</i>               | pET28a containing the full length of <i>lmo1173</i>                               | This study             |

<sup>a</sup> Amp<sup>R</sup>: resistance to ampicillin; Ery<sup>R</sup>: resistance to erythromycin.
