# Supplementary material for: Cross-Phosphorylation between AgrC Histidine Kinase and the Noncognate Response Regulator Lmo1172 in Listeria monocytogenes under Benzalkonium Chloride Stress
Source: MDPI journal article supplement (doi:10.3390/microorganisms12020392), 2024-02-16
Supplement: s1 [file s1]

**Table S2.** Primers used in this study.

| Gene/Protein   | Primer Name | Sequence (5'-3') <sup>a</sup> | Annealing Temperature | Reference  |
|----------------|-------------|-------------------------------|-----------------------|------------|
| RT-qPCR        |             |                               |                       |            |
| <i>agrBD</i>   | RTlmo0048-1 | GCTGGAAAGATGATGAAGAA          | 55°C                  | 22         |
|                | RTlmo0048-2 | TCTATCGGTCACCTTTCGTATCT       |                       |            |
| <i>agrC</i>    | RTlmo0050-1 | CTCTACAAAAGGAGAAGGTCGT        | 55°C                  | 22         |
|                | RTlmo0050-2 | TCTATCGGTCACCTTTCGTATCT       |                       |            |
| <i>agrA</i>    | RTlmo0051-1 | GCAAGCAGAAGAACGGATTT          | 57°C                  | 22         |
|                | RTlmo0051-2 | CTGTGGCACCGATAAAATGA          |                       |            |
| <i>lmo0287</i> | RTlmo0287-1 | CTTGGTGCGGATGACTATGT          | 56°C                  | This study |
|                | RTlmo0287-2 | TCTTCCTCGGCTGTGCTT            |                       |            |
| <i>lmo0691</i> | RTlmo0691-1 | ATGCGATGTTTCATGCGTAC          | 58°C                  | This study |
|                | RTlmo0691-2 | TGGCGTCTACAACCATACCT          |                       |            |
| <i>lmo1022</i> | RTlmo1022-1 | GGCACTTGAAGCTGGAGCG           | 58°C                  | This study |
|                | RTlmo1022-2 | TTTAGCGGTTAGCCGTTGC           |                       |            |
| <i>lmo1060</i> | RTlmo1060-1 | TACCGAAACCTTTGAAGTGAT         | 54°C                  | This study |
|                | RTlmo1060-2 | ATGCGTATTGATAATGGACGT         |                       |            |
| <i>lmo1172</i> | RTlmo1172-1 | CTTACCGCATTTAGTGACCC          | 55°C                  | This study |
|                | RTlmo1172-2 | TTTCTTGTTTCTCGCCCTTT          |                       |            |
| <i>lmo1377</i> | RTlmo1377-1 | AGCGGTTGCTAATGATGGA           | 58°C                  | This study |
|                | RTlmo1377-2 | AGCGAAAGGTTTGACGATG           |                       |            |
| <i>lmo1507</i> | RTlmo1507-1 | TGATATTGCGATTATTGACC          | 53°C                  | This study |
|                | RTlmo1507-2 | CCATTAAAGTAAGTGGGCTA          |                       |            |
| <i>lmo1745</i> | RTlmo1745-1 | TAATGGCGAGGATAAATGC           | 54°C                  | This study |
|                | RTlmo1745-2 | CTTTCATCTTCCCAAAGTGC          |                       |            |

|                            |             |                                                    |      |            |
|----------------------------|-------------|----------------------------------------------------|------|------------|
| <i>lmo1948</i>             | RTlmo1948-1 | TGATGATGCCTGGTAAAGA                                | 51°C | This study |
|                            | RTlmo1948-2 | GTGGGAAGGTAATAATGTCTC                              |      |            |
| <i>lmo2010</i>             | RTlmo2010-1 | ATTGAGGGATTGGAAGAGG                                | 54°C | This study |
|                            | RTlmo2010-2 | CTGCGTTAATATGGAAGTCGT                              |      |            |
| <i>lmo2422</i>             | RTlmo2422-1 | GTGCCAAGGCTGAAGACAA                                | 56°C | This study |
|                            | RTlmo2422-2 | GCCACCAACCGTTACAACA                                |      |            |
| <i>lmo2501</i>             | RTlmo2501-1 | TGACCTAACACCGAAAGAA                                | 52°C | This study |
|                            | RTlmo2501-2 | CAAATGGCTAACATGAAGC                                |      |            |
| <i>lmo2515</i>             | RTlmo2515-1 | GCACTTAGAGCTGGAGCA                                 | 52°C | This study |
|                            | RTlmo2515-2 | TAGCCATAAACACCTTGAGA                               |      |            |
| <i>lmo2583</i>             | RTlmo2583-1 | TGCCTAACATGGATGGTTT                                | 55°C | This study |
|                            | RTlmo2583-2 | TTTGACTTCGCTTGCTTGA                                |      |            |
| <i>lmo2678</i>             | RTlmo2678-1 | AAAAGTGCCGATTATTGTTG                               | 55°C | This study |
|                            | RTlmo2678-2 | GAGGAGTTCCGATGTGCC                                 |      |            |
| <i>lmo1173</i>             | RTlmo1173-1 | TCATTCATCATAACCAACCAA                              | 55°C | This study |
|                            | RTlmo1173-2 | TTAGGACGGCAATAACTCG                                |      |            |
| 16S rRNA                   | RT16S1      | GGGAGGCAGCAGTAGGGA                                 | 55°C | 29         |
|                            | RT16S2      | CCGTCAAGGGACAAGCAG                                 |      |            |
| Mutant strain construction |             |                                                    |      |            |
| <i>agrBD</i>               | lmo0048/9-1 | NNNNNNGGATCCGTCTACAAAGTTGATGGGATT ( <i>Bam</i> HI) | 50°C | This study |
|                            | lmo0048/9-2 | ACTCATAGAAGAATCCGCAAATCATCTTTCCAGCGGTC             |      |            |
|                            | lmo0048/9-3 | GACCGCTGGAAAGATGATTTGCGGATTCTTCTATGAGT             | 51°C |            |
|                            | lmo0048/9-4 | NNNNNNACGCGTGCTAAGACAGTAAGAGCAACG ( <i>Mlu</i> I)  |      |            |
| <i>agrC</i>                | lmo0050-1   | NNNNNNGGATCAGAAAAGCGATGATAGGGA ( <i>Bam</i> HI)    | 53°C | This study |
|                            | lmo0050-2   | CATAAATTCATCCCCATTCTTTGCTATAGTAACCAATCCCTCT        |      |            |
|                            | lmo0050-3   | AGAGGGATTGGTTACTATAGCAAAGAATGGGGATGAATTTATG        | 53°C |            |

|                       |                |                                                             |      |            |
|-----------------------|----------------|-------------------------------------------------------------|------|------------|
|                       | lmo0050-4      | NNNNNN <u>ACGCG</u> ACCTGTGGCACCGATAAA ( <i>Mlu</i> I)      |      |            |
| <i>lmo1172</i>        | lmo1172-1      | NNNNNN <u>GGATCC</u> ATAATGCG TCTTGTCTTG ( <i>Bam</i> HI)   | 55°C | This study |
|                       | lmo1172-2      | AACACATTTCTCGAATCGTTGTCCTCTTCTTCTGCTATTGAT                  |      |            |
|                       | lmo1172-3      | ATCAATAGCAGAAGAAGAGGACAACGATTTCGAGAAATGTGTT                 | 55°C |            |
|                       | lmo1172-4      | NNNNNN <u>ACGCG</u> TTCTTGCTCGTCCTCTTC ( <i>Mlu</i> I)      |      |            |
| <i>lmo1173</i>        | lmo1173-1      | NNNNNN <u>GGATC</u> AATAGAACCGAGCACAAAGAC ( <i>Bam</i> HI)  | 54°C | This study |
|                       | lmo1173-2      | GCTTCATCGCTTTTTTCATAGCGCTCATCACAATCGTTTC                    |      |            |
|                       | lmo1173-3      | GAAACGATT GTGATGAGCGCTATGAAAAAGCGATGAAGC                    | 54°C |            |
|                       | lmo1173-4      | NNNNNN <u>ACGCG</u> TTCTTGTTTCACGGTCTACTTT ( <i>Mlu</i> I)  |      |            |
| <i>lmo1172lmo1173</i> | lmo1172/3-1    | NNNNNN <u>GGATCC</u> ATAATGCG TCTTGTCTTG ( <i>Bam</i> HI)   | 54°C | This study |
|                       | lmo1172/3-2    | GCTTCATCGCTTTTTTCATAGGTCCTCTTCTTCTGCTATTGAT                 |      |            |
|                       | lmo1172/3-3    | ATCAATAGCAGAAGAAGAGGACCTATGAAAAAGCGATGAAGC                  | 54°C |            |
|                       | lmo1172/3-4    | NNNNNN <u>ACGCG</u> TTCTTGTTTCACGGTCTACTTT ( <i>Mlu</i> I)  |      |            |
| Complementation       |                |                                                             |      |            |
| <i>agrBDCA</i>        | lmo0048/0051-5 | NNNNNN <u>GTCGACT</u> AAAATGGAAAAGCCAACTG ( <i>Sal</i> I)   | 50°C | This study |
|                       | lmo0048/0051-6 | NNNNNN <u>GGATCC</u> TACCTTTTGCCTGAATTTGA ( <i>Bam</i> HI)  |      |            |
| <i>agrBD</i>          | lmo0048/9-5    | NNNNNN <u>GAGCTC</u> TAAAATGGAAAAGCCAACTG ( <i>Sac</i> I)   | 52°C | This study |
|                       | lmo0048/9-6    | NNNNNN <u>GGATCC</u> GAAAGAATCCGCAACTTTCA ( <i>Bam</i> HI)  |      |            |
| <i>lmo1172</i>        | lmo1172-5      | NNNNNN <u>GAGCTC</u> ATAGAACCGAGCACAAAGAC ( <i>Sac</i> I)   | 50°C | This study |
|                       | lmo1172-6      | NNNNNN <u>GGATCC</u> TTAGTCATCGCTCATCACA ( <i>Bam</i> HI)   |      |            |
| Expression of protein |                |                                                             |      |            |
| Lmo1172               | lmo1172-7      | NNNNNN <u>GGATCC</u> GTGACAGGAATGAATGGAAG ( <i>Bam</i> HI)  | 55°C | This study |
|                       | lmo1172-8      | NNNNNN <u>CTCGAGG</u> CTTCTTCTAAGATGTCTCGG ( <i>Xho</i> I)  |      |            |
| Lmo1173               | lmo1173-7      | NNNNNN <u>GGATCC</u> ATGACTAAAACGATTTCGAGA ( <i>Bam</i> HI) | 55°C | This study |
|                       | lmo1173-8      | NNNNNN <u>CTCGAG</u> CTACTTCTTTGTAGCATGGATA ( <i>Xho</i> I) |      |            |
| EMSA                  |                |                                                             |      |            |

|                |     |                      |      |    |
|----------------|-----|----------------------|------|----|
| P <sub>2</sub> | P-3 | TAAAATGGAAAAGCCAACTG | 50°C | 49 |
|                | P-4 | CTAATTCACCTCCACTAATA |      |    |

---

<sup>a</sup> Restriction sites are underlined. N, any of the bases.
